# Supplementary material for: Dysregulation of Dicer1 in Beta Cells Impairs Islet Architecture and Glucose Metabolism
Source: Hindawi journal article supplement (doi:10.1155/2012/470302), 2012-01-01
Supplement: f1 [file 470302.f1.pdf]

### Supplementary

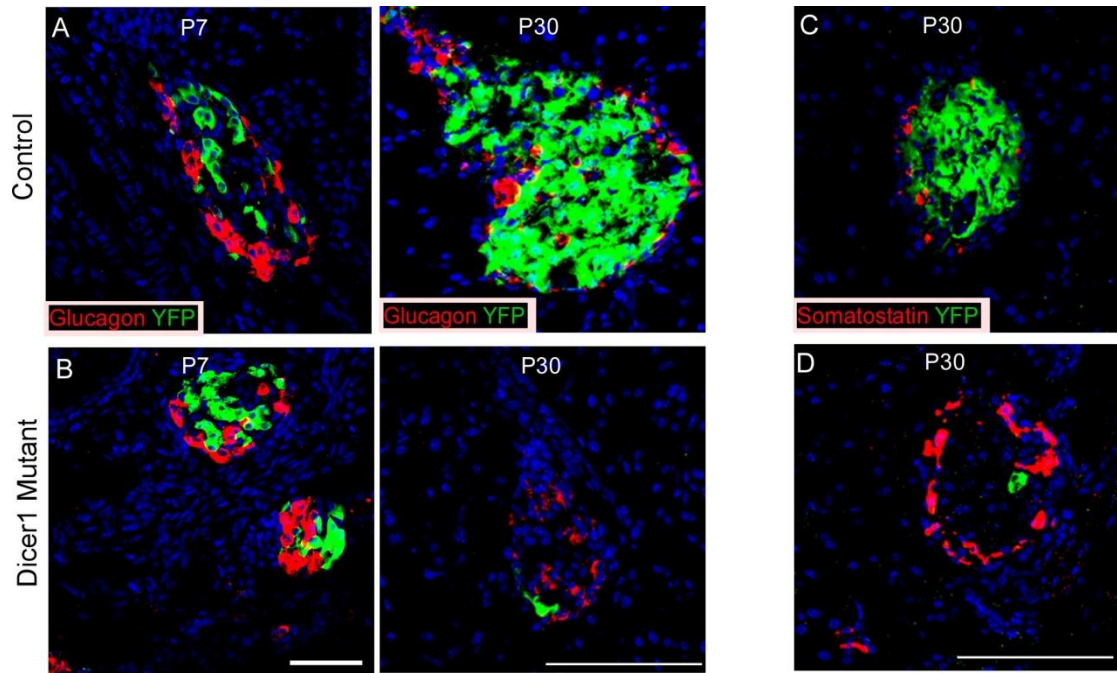

**Figure S1: Dicer1 null cells do not express alternative endocrine cell marker.**

Normal glucagon expression in alpha cells of RIP-Cre;*Dicer1*<sup>LoxP/LoxP</sup> islets and control at post-natal days 7 and 30 (A,B) and of somatostatin at post-natal day 30 (C,D). Notably, YFP-positive *Dicer1*-null cells are rarely seen at the age of 30 days, consistent with figures in the main text. Bar - 50 $\mu$ m.

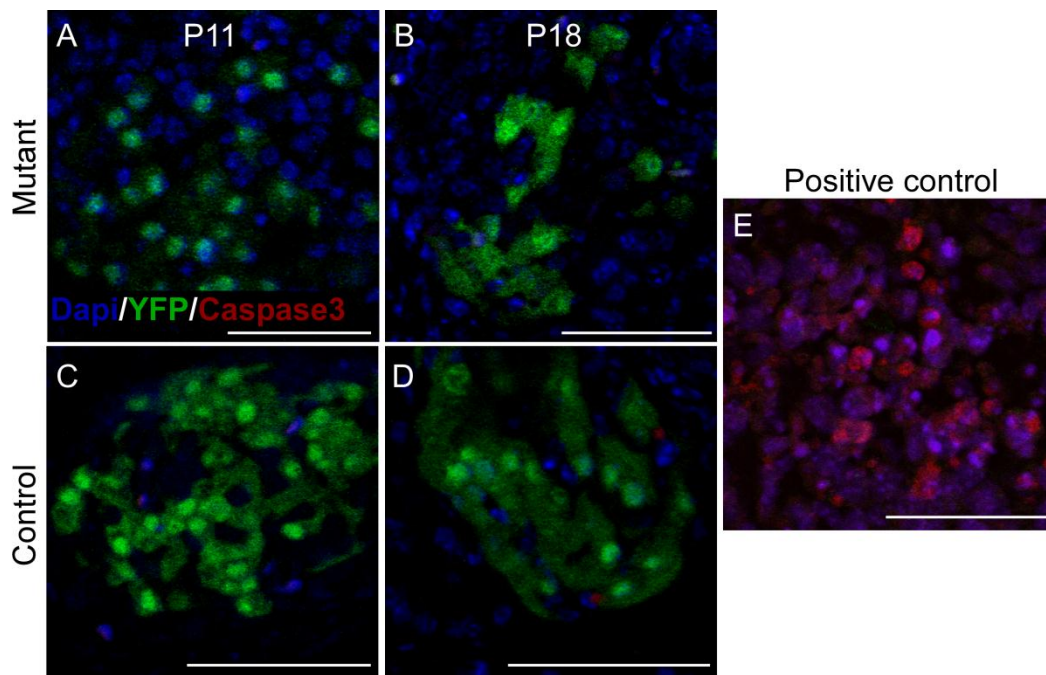

**Figure S2: Dicer1 null cells do not undergo apoptosis.** Fluorescent immunostaining for activated-caspase 3, neither reveal apoptosis in Dicer1 null cells (A,B) nor in control pancreata (C,D). Positive signal, providing technical control for detection of activated-caspase 3 in irrelevant tissue (embryonic branchial arches, E) Bar - 50µm.

#### Primers table

| Gene name (F-forward, R-reverse) | Forward Primer             |
|----------------------------------|----------------------------|
| Dicer1_F                         | CCTGACAGTGACGGTCCAAAG      |
| Dicer1_R                         | CATGACTCTTCAACTCAAAC       |
| Cre_F                            | TGCCACGACCAAGTGACAGC       |
| Cre_R                            | CCAGGTTACGGATATAGTTCATG    |
| Rosa26YFP_F                      | TGTTTTGGAGGCAGGAAGCACTTG   |
| Rosa26YFP_R Wild-type            | GCTGCATAAACCCAGATGACTCC    |
| Rosa26YFP_R knockin              | CATCAAGGAAACCCTGGACTACTG   |
| Cdh1_F                           | GGG TCTCAC CGT AGT CCT CA  |
| Cdh1_R                           | GAT CTT TGG GAG AGC AGT CG |
